# Supplementary material for: Synthesis and structures of bimetallic and polymeric zinc coordination compounds supported by salicylaldiminato and anilido–aldimine ligands
Source: Royal Society of Chemistry journal article supplement (doi:10.1039/b615080b), 2006-12-15
Supplement: b615080b.pdf [file b615080b.pdf]

Supplementary Information

for

---

**Synthesis and Structures of Bimetallic and Polymeric Zinc  
Coordination Compounds Supported by Salicylaldiminato and  
Anilido-alimine Ligands**

---

David J. Doyle, Vernon C. Gibson\* and Andrew J. P. White

## X-ray crystallography

*Crystal data for 2b*:  $C_{38}H_{60}N_2O_2Zn_2$ ,  $M = 707.62$ , orthorhombic,  $Aba2$  (no. 41),  $a = 18.1320(8)$ ,  $b = 18.8215(7)$ ,  $c = 23.1100(9)$  Å,  $V = 7886.8(5)$  Å<sup>3</sup>,  $Z = 8$ ,  $D_c = 1.192$  g cm<sup>-3</sup>,  $\mu(\text{Mo-K}\alpha) = 1.248$  mm<sup>-1</sup>,  $T = 173$  K, pale yellow plates, Oxford Diffraction Xcalibur 3 diffractometer; 12497 independent measured reflections,  $F^2$  refinement,  $R_1 = 0.063$ ,  $wR_2 = 0.149$ , 11979 independent observed absorption-corrected reflections [ $|F_o| > 4\sigma(|F_o|)$ ,  $2\theta_{\text{max}} = 65^\circ$ ], 404 parameters. The structure of **1** was shown to be a partial polar twin by a combination of  $R$ -factor tests [ $R_1^+ = 0.0646$ ,  $R_1^- = 0.0726$ ] and by use of the Flack parameter [ $x^+ = +0.260(12)$ ,  $x^- = +0.740(12)$ ]. CCDC 621015.

*Crystal data for 4c*:  $C_{45}H_{60}N_4Zn_2$ ,  $M = 787.71$ , triclinic,  $P\bar{1}$  (no. 2),  $a = 8.9147(5)$ ,  $b = 14.7627(9)$ ,  $c = 16.4967(9)$  Å,  $\alpha = 88.863(6)$ ,  $\beta = 86.406(4)$ ,  $\gamma = 72.948(5)^\circ$ ,  $V = 2071.5(2)$  Å<sup>3</sup>,  $Z = 2$ ,  $D_c = 1.263$  g cm<sup>-3</sup>,  $\mu(\text{Cu-K}\alpha) = 1.676$  mm<sup>-1</sup>,  $T = 173$  K, yellow blocks, Oxford Diffraction Xcalibur PX Ultra diffractometer; 7684 independent measured reflections,  $F^2$  refinement,  $R_1 = 0.042$ ,  $wR_2 = 0.120$ , 6428 independent observed absorption-corrected reflections [ $|F_o| > 4\sigma(|F_o|)$ ,  $2\theta_{\text{max}} = 142^\circ$ ], 469 parameters. CCDC 621016.

The C(37) ethyl ligand in the structure of **2b**, and the C(27) isopropyl moiety in the structure of **4c**, were both found to be disordered. In each case two orientations for the terminal methyl groups were identified with *ca.* 75% and 25% occupancy, respectively; the carbon atom(s) of major occupancy orientations were refined anisotropically, whilst those of the minor occupancy orientations were refined isotropically.

*Crystal data for 5c*:  $C_{48}H_{66}N_4Zn_2$ ,  $M = 829.79$ , monoclinic,  $P2_1/n$  (no. 14),  $a = 11.5694(6)$ ,  $b = 13.4841(8)$ ,  $c = 14.3159(7)$  Å,  $\beta = 98.626(4)^\circ$ ,  $V = 2208.1(2)$  Å<sup>3</sup>,  $Z = 2$  [ $C_i$  symmetry],  $D_c = 1.248$  g cm<sup>-3</sup>,  $\mu(\text{Mo-K}\alpha) = 1.122$  mm<sup>-1</sup>,  $T = 173$  K, yellow blocks, Oxford Diffraction Xcalibur 3 diffractometer; 7658 independent measured reflections,  $F^2$  refinement,  $R_1 = 0.045$ ,  $wR_2 = 0.095$ , 3959 independent observed absorption-corrected reflections [ $|F_o| > 4\sigma(|F_o|)$ ,  $2\theta_{\text{max}} = 65^\circ$ ], 244 parameters. CCDC 621017.

**Table S1.** Selected bond lengths (Å) and angles (°) for **5c**.

|               |            |               |            |
|---------------|------------|---------------|------------|
| Zn–N(1)       | 1.9277(16) | Zn–N(7)       | 1.9906(17) |
| Zn–C(23)      | 1.947(2)   |               |            |
|               |            |               |            |
| N(1)–Zn–N(7)  | 94.65(7)   | N(1)–Zn–C(23) | 139.00(9)  |
| N(7)–Zn–C(23) | 126.34(9)  |               |            |

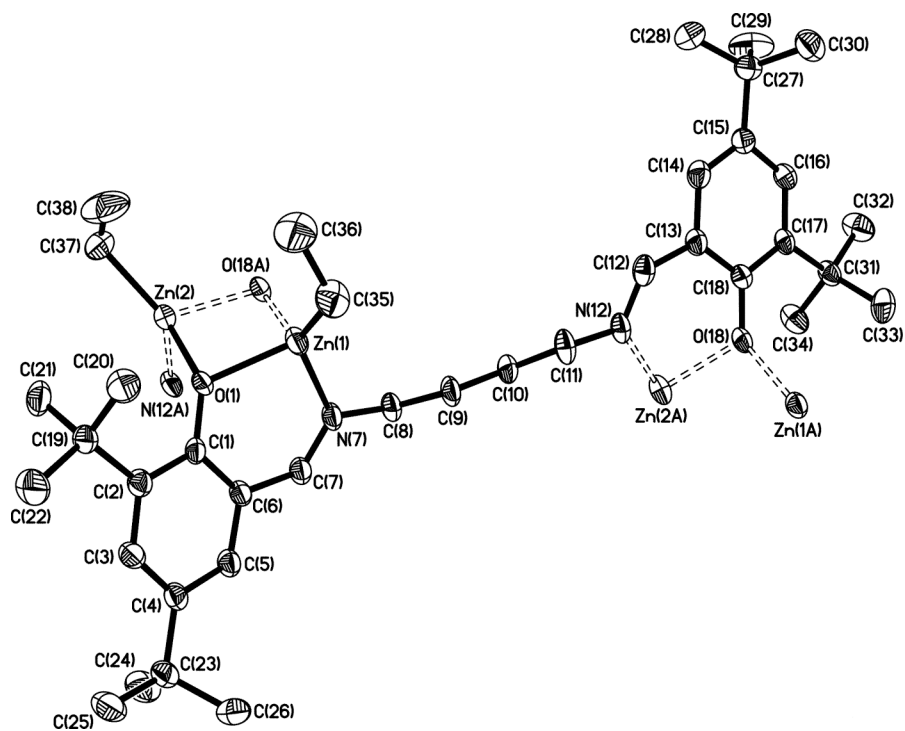

Fig. S1 The asymmetric unit in the structure of **2b** (50% probability ellipsoids).

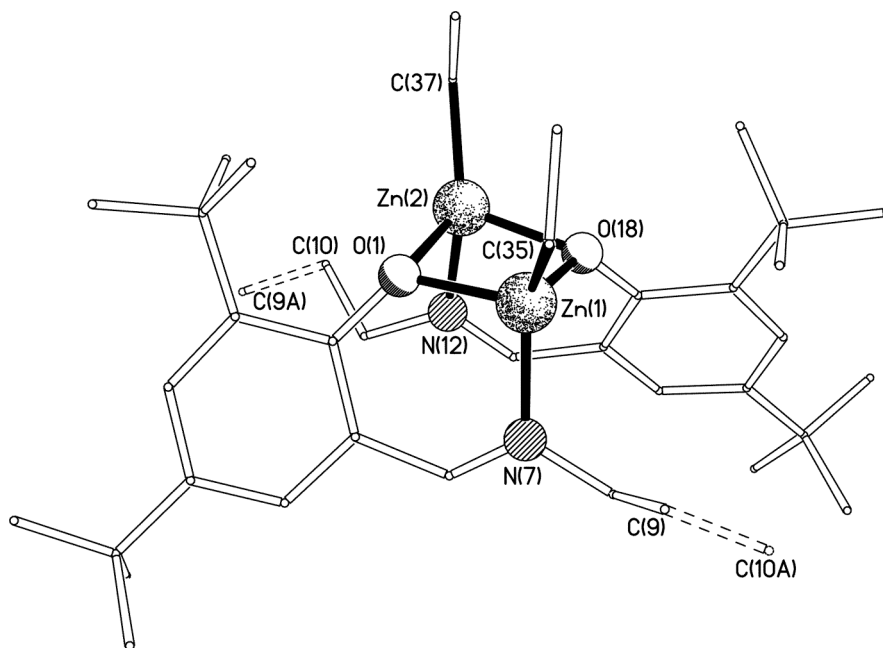

Fig. S2 The environment of the  $Zn_2O_2$  ring in the structure of **2b**.

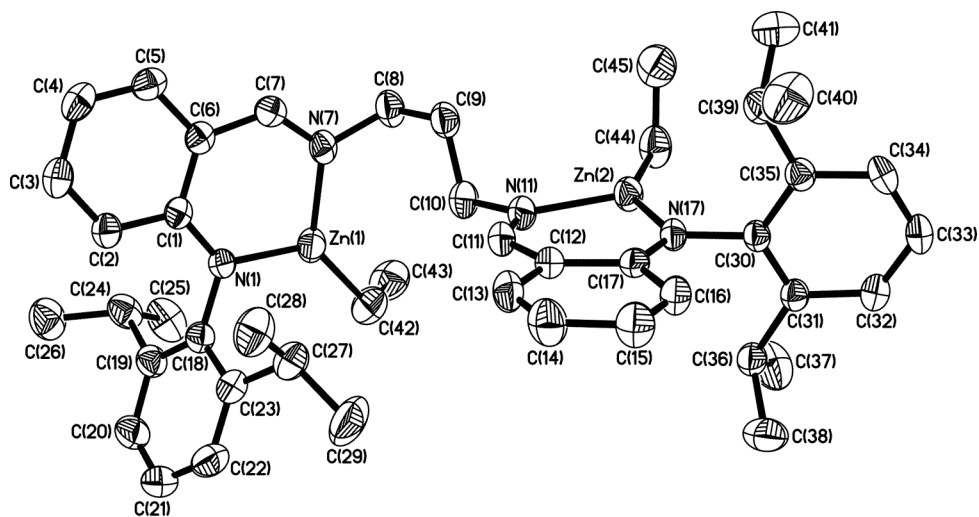

**Fig. S3** The molecular structure of **4c** (50% probability ellipsoids).

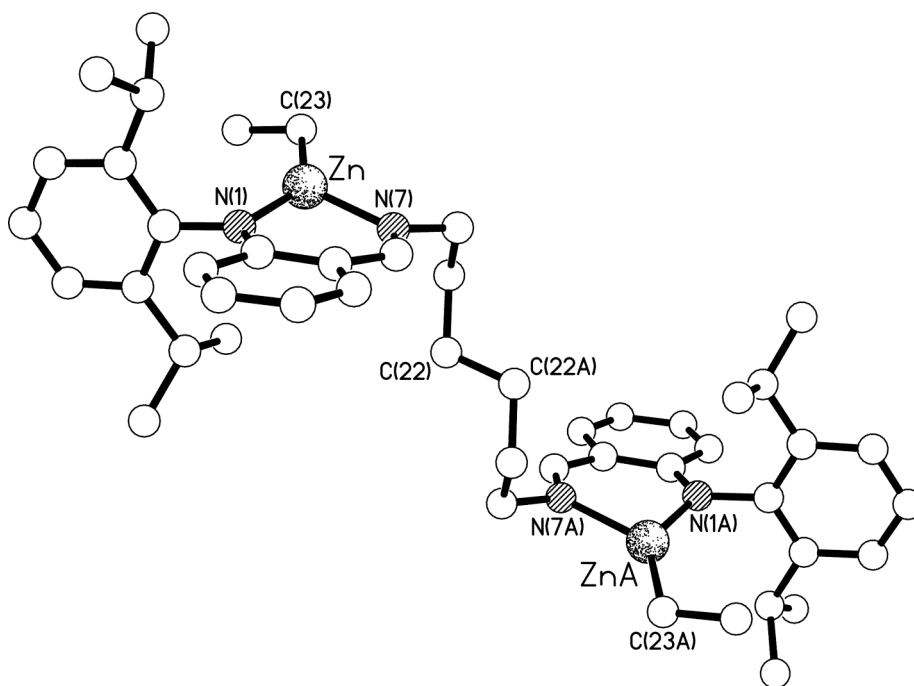

**Fig. S4** The molecular structure of **5c**.

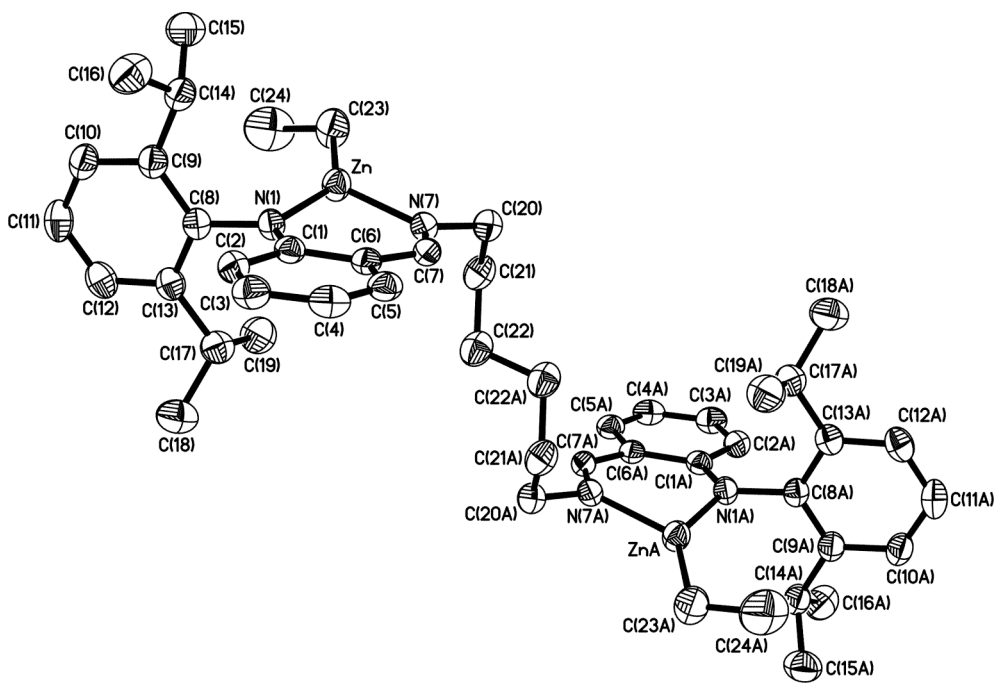

**Fig. S5** The molecular structure of 5c (50% probability ellipsoids).
